# Supplementary material for: Personal hygiene practice and associated factors among elementary school students in Fiche Town, Oromia, Ethiopia, 2022
Source: Research Square preprint supplement (doi:10.21203/rs.3.rs-4173841/v1), 2024-04-12
Supplement: Supplementary file 1 [file aa7b5d384d7f1bb1aeb23c70.docx]

**Annex I. The English Version of Structured Questionnaires Questionnaire on**

**Title: -** Personal hygiene practice and associated factors among elementary school students in Fiche north Shoa, central, Oromia, Ethiopia

How are you? My name is _____________________. I am going to interview you about personal hygiene and related factors among primary school students in Fiche town. You have selected to provide me the information for the question I will ask you. The information you provide will help to improve students’ personal hygiene which prevent students from different infections. The information you will provided to the questions I will ask you does not contain any information that expose your identity. It contains only the information related to your personal hygiene. All information you will tell me will be kept confidential and not used for other purpose without your permission. The interview will be completed in person; if you do not want to participate in this study, you can refuse from the begging and stop at any time during interview process without any explanation. The interview will take about 20 minutes to complete. If you have any questions about the study, you can ask question at any step of the interview. To show your agreement to participate in this study, you have to sign for me in the space provided below. If you have any complain regarding this study, you can contact Mr. Getaneh Haile at + 251-920-40-57-70 or Email address: -getanehhaile3@gmail.com. If he will not be cooperative to solve your complain, you can contact Salale University Institutional Review Board Committee Chairman Dr. Solomon Balami at +251 938494848.

Consent Form

I have understood the purpose and procedure of this study based on the explanation given to me or I have read and understood the objective and procedure of this study. Thus, I shown my agreement by providing signature participant colunteertly in this study.

**Do you want to participate in this survey?**

If no, thank you for your time and consideration.

If yes, please sign below to show your volunteer agreement.

Name of participant---------------------------- Signature-------------------Date---------------------

I hereby declare that I fully and truthfully informed this participant about the procedure and purpose of this study until he/she understood.

Participant’s unique ID number:

Name of data collector: Date:

School name: signature*:*

| S.no | | | | **General information** | | | Possible response | Remark | | |
| --- | --- | --- | --- | --- | --- | --- | --- | --- | --- | --- |
| I | | | | What is the school level of educational grade? | | | 1. Grade 1-8 2. Grade 5-8 |  | | |
| **I.               *Questionaries’ on socio demographic characteristics of the respondent*** | | | | | | | | | | |
| 00 | | | | How old are you? | | | _______________________ in year |  | | |
| 01 | | | | Sex? | | | 1.Male 2.Female |  | | |
| 02 | | | | What is your Grade level? | | | _______ |  | | |
| 03 | | | | Who is head of the house hold? | | | 1. Father 2.Mother 3. Other____ |  | | |
| 04 | | | | What is your mother educational status? | | | 1.Illiterate  2.Primary and secondary  3. Certificate  4.Diploma and above |  | | |
| 05 | | | | What is your father education status? | | | 1.Illiterate/no formal education  2.Primary and secondary  3. Certificate  4. Diploma and above |  | | |
| 06 | | | | What is your mother occupation? | | | 1.Farmer  2.Governmt employee  3.Merchant  4.House wife  5. Other specify………. |  | | |
| 07 | | | | What is your father occupation? | | | 1.Farmer  2.Governmt employee  3.Merchant  4. Other specify………. |  | | |
| 08 | | | | How many numbers of families live in your home? | | | ____________ |  | | |
| 09 | | | | What is Religion? | | | 1.Orthodox Christian  2.Muslim  3.Protestant  4.Other specify---------------------- |  | | |
| ***II. knowledge on personal hygiene question*** | | | | | | | | | | |
| 100 | | | Have you heard about personal hygiene? | | | 1. Yes | | |  | |
| 2. No => **skip to 102** | | |
| 101 | | | If yes, What is your source of information about personal hygiene? | | | 1. Family 2. Teacher  3. Health worker 4. Media  5. School club 6. Others(specify)_____ | | |  | |
| 102 | | | Does Personal hygiene is about general body cleanliness | | | 1. Yes  2. No  3. I Don’t know | | |  | |
| 103 | | | Can hand washing after eating prevent communicable disease? | | | 1. Yes 2. No 3. I don’t know | | |  | |
| 104 | | | Does proper hand washing is preventing 30-40% communicable disease? | | | 1. Yes 2. No 3. I don’t know | | |  | |
| 105 | | | When do you think it is the most necessary to wash hands?(more than one answer possible) | | | 1. After eating 2. After visiting latrine 3. Before eating 4. Other specify ________________ | | |  | |
| 106 | | | Do human feces contain germs that could transmit from person to person? | | | 1. Yes 2. No 3. I don’t know | | |  | |
| 107 | | | Does keeping your finger nail trimmed and clean shows personal hygiene? | | | 1. Yes 2. No 3. I don’t know | | |  | |
| 108 | | | Do you think hand washing is not requiring when there is no visible dirty? | | | 1. Yes 2. No 3. I don’t know | | |  | |
| 109 | | | Is washing body part of personal hygiene? | | | 1. Yes 2. No 3. I don’t know | | |  | |
| 110 | | | Does well trimmed/cut hair a personal hygiene? | | | 1. Yes 2. No 3. I don’t know | | |  | |
| 111 | | | Can rinsing mouth with clean water after meal protect oral health? | | | 1. Yes 2. No 3. I don’t know | | |  | |
| 112 | | | Does cleaning teeth with chewing stick/toothpaste and brush prevent tooth decay and bad odor breath? | | | 1. Yes 2. No 3. I don’t know | | |  | |
| 113 | | | Brush your teeth every day cause for gum bleeding? | | | 1. Yes 2. No | | |  | |
| 114 | | | Does poor personal hygiene result water related disease like diarrhea, scabies etc.? | | | 1. Yes 2. No 3. I don’t know | | |  | |
| 115 | | | What happens if one does not practice personal cleanliness? | | | 1. May get sick and smell in class 2. Will smell in class only 3. Will be punished by the teacher 4. Nothing happen | | |  | |
| ***III. Personal Hygiene practice questions*** | | | | | | | | | | |
| 200 | Do you take a bath? | | | | | 1. yes 2. No | | |  | |
| 201 | How many times take a bath? | | | | | 1.     1-2 times in a day 3.every two week  2.     every weeks 4.every month  5.     other (specify)__________________ | | |  | |
| 202 | Do you wash your hands? | | | | | 1. Yes 2. No | | |  | |
| 203 | Do you use soap/ash during hand washing? | | | | | 1. Yes 2. No | | |  | |
|  | |
| 204 | Do you wash your hand with soap/ash always before eating? | | | | | 1. Yes 2. No | | |  | |
| 205 | Do you wash your hand with soap/ash always after eating? | | | | | 1. Yes 2. No | | |  | |
| 206 | Do you wash your hand with soap/ash always after visiting toilet? | | | | | 1. Yes 2. No | | |  | |
| 207 | Have you brush your teeth? | | | | | 1. Yes 2. 2. No | | |  | |
| 208 | Do you brush your teeth every day? | | | | | 1. Yes 2. No | | |  | |
| 209 | How many times brush your teeth in a day? | | | | | 1. One 2. Twice 3. Three and more | | |  | |
| 210 | How long brushing your teeth? | | | | | 1. < 60 seconds 2. between 60 and 120 seconds 3. >120 seconds | | |  | |
|  | |
|  | |
| 211 | What you use to brush your teeth? | | | | | 1. Sticks 2. Flossing 3. Teeth Brush with soap 4. Teeth Brush with soap and flossing | | |  | |
|  | |
| 212 | Have you checked your teeth by the dentist? | | | | | 1. Yes 2. No | | |  | |
| 213 | How often do you see your Dentist in a year in the absence of illness? | | | | | 1. Regularly 2. Occasionally 3. Don’t seen | | |  | |
| 214 | where you are always defecate at home school and other area | | | | | 1. Latrine 2. In the compound 3. Near the river 4. Near the road 5. In forest/yard | | |  | |
| 215 | What do you use for anal cleaning? (more than one answer possible) | | | | | 1.   Tissue paper 2.  Newspaper  3.   Water 4.   Leaves  5. Other specify………….. | | |  | |
| 216 | Do you cut your nail? | | | | | 1. Yes 2. No | | |  | |
|  | |
| 217 | How often do you cut your nails? | | | | | 1. Weekly 2. Monthly 2. More than a month | | |  | |
|  | |
|  | |
| 218 | Do you have wash your hair? | | | | | 1. yes  2. No | | |  | |
| 219 | How often do you wash your hair? | | | | | 1. Every day 2. Every week 3. Every month 4. Other specify_______________ | | |  | |
| 220 | Do you wash your face? | | | | | 1. Yes 2. No | | |  | |
|  | |
| 221 | How many times wash your face in a day? | | | | | 1. Once 2. Twice 3. Three times and more | | |  | |
|  | |
| 222 | What do you use to wash your face? | | | | | 1.     Only water  2.     Water and soap  3.    Other(specify)________________ | | |  | |
| 223 | Do you have illness last two weeks? | | | | | 1. Yes 2. No | | |  | |
| 224 | What was the illness? | | | | | 1. Diarrheal disease 2. Headache 3. Respiratory infection 4. Other | | |  | |
| **Factors affecting personal hygienes** | | | | | | | | | | |
| 300 | Have you ever received education on personal hygiene at school? | | | | | 1. Yes 2. No =>**if no skip to 302** | | |  | |
|  | |
| 301 | If yes for Q-300 who provided the education about personal hygiene? Possible more than one answer) | | | | | 1. Teachers 2. Health professionals 3. Non-governmental organization 4. School club members 5. Media (Radio, TV, Social media) 6. other (specify) | | |  | |
| 302 | Is there health related clubs in your school? | | | | | 1. Yes 2. No **=>skip to 204** | | |  | |
| 303 | What types of club are there in school related with personal hygiene? | | | | | 1. Environmental management club 2. Menstrual hygiene management 3. other specify__________ | | |  | |
|  | |
|  | |
| 304 | Is there a practice of students’ personal hygiene inspection in the school? | | | | | 1. Yes 2. No => **SKIP TO 206** | | |  | |
|  | |
| 305 | If yes, how often does it take place? | | | | | 1. Every day 2. Every week 3. Every two weeks 4. Every month   5. Randomly | | |  | |
|  | |
|  | |
| 306 | Have you had any training at school on personal hygiene? | | | | | 1. Yes 2. No =>**SKIP TO 208** | | |  | |
| 307 | If yes, what was the topic of training? (more than one answer possible) | | | | | 1. Menstrual hygiene 2. Hygiene and sanitation 3. Other specify…… | | |  | |
| 308 | Are there toilets in the school? | | | | | 1. Yes 2. No **=>SKIP TO – Q320** | | |  | |
| 309 | If yes, is there separate toilet facility for boys and girls? | | | | | 1. Yes 2. No | | |  | |
| 310 | Are the toilets accessible to children with physical disabilities? | | | | | 1. Yes **=>SKIP TO Q-312** | | |  | |
| 1. No | | |
| 311 | If no, why it is not accessible? | | | | | 1. Because of the design 2. It is too far 3. I don’t know 4. Other specify________________________ | | |  | |
| 312 | What mainly promotes to use of latrine? | | | | | 1. Sex separated 2. Cleanliness  3. Privacy 4. Safety | | |  | |
| 313 | What is the cleanliness status of the toilets | | | | | 1. Always clean 2. Sometimes clean 3. Always unclean | | |  | |
| 314 | Are the toilets accessible and convenient for use? | | | | | 1.Yes | | |  | |
| 2.No | | |
| 315 | Are there hand washing facilities near the toilets? | | | | | 1. Yes 2. No **=> SKIP TO Q-317** | | |  | |
| 316 | How often detergents or ash are there near the hand washing facility? | | | | | 1. Always 2. Sometimes 3. There is no | | |  | |
| 317 | Is there water at school? | | | | | 1. yes 2. No **=>skip to Q- 400** | | |  | |
| 318 | If yes, what type of water source is it? | | | | | 1.Piped water 3.rever water | | |  | |
| 2. Protected spring 4 hand dug well | | |
| 5. Unprotected spring 6. other specify | | |
| 319 | What is the status of the water point in the school? | | | | | 1. Always working 2. Works occasionally 3. Never working | | |  | |
| 320 | How to treat the water in school? | | | | | 1. By chemical chlorine 2. By boiling 3. By water filter | | |  | |
| **III.VI Questioner only for girls on menstrual management hygiene practices** | | | | | | | | | |  |
| 400 | | Does your menses started? | | | 1. Yes 2. No **if no *you are finished the questionnaire*** | | | | |  |
|  |
| 401 | | If yes Q-400, what type of material do you use during menses? | | | 1. Disposable sanitary pads =>***skip to 404*** 2. Reusable cloth/towel Knickers 3. Other__________________ | | | | |  |
|  |
| 402 | | Would you like to purchase disposable pads? | | | 1. Yes =>***skip to 404*** 2. No | | | | |  |
| 403 | | If no, why do you not purchase disposable pads? | | | 1. Didn’t have enough money” 2. “Not available ” 3. “I felt embarrassed” 4. No awareness on sanitary pads | | | | |  |
| 404 | | Do you have supply pads in school? | | | 1. Yes 2. No =>***skip to 406*** | | | | |  |
|  |
| 405 | | Is there in school that has emergency supply of pads? | | | 1. Yes 2. No | | | | |  |
| 406 | | How many times changing pads a days? | | | 1. Once a day  2. Twice a day  3. Three or more times a day | | | | |  |
| 407 | | Where are you changing modes in school? | | | 1. In toilet 2. Bathing room 3. Menstrual hygiene management Room | | | | |  |
| 408 | | How to washed pads at home? | | | 1. With water 2. With water and soap/detergent 3. Other (specify)____________ | | | | |  |
| 409 | | Where do you drying washed pads at home? | | | 1.    In the bath room  2.    In the sun/open space  3.    Inside the house/room  4.    Other____________ | | | | |  |
| 410 | | How many times do you take bath during menstruation? | | | 1. Once a day 2. Twice a day 3. Three or more times a day 4. other (specify)__________________ | | | | |  |

Thank you very much for give your time participated
